# Supplementary material
Source: Springer Nature journal article supplement (https://www.springermedizin.de/resource/supplementary/12958_2010_734_MOESM4_ESM.pdf/9568362)

## ESTROUS CYCLE

## EARLY PREGNANCY

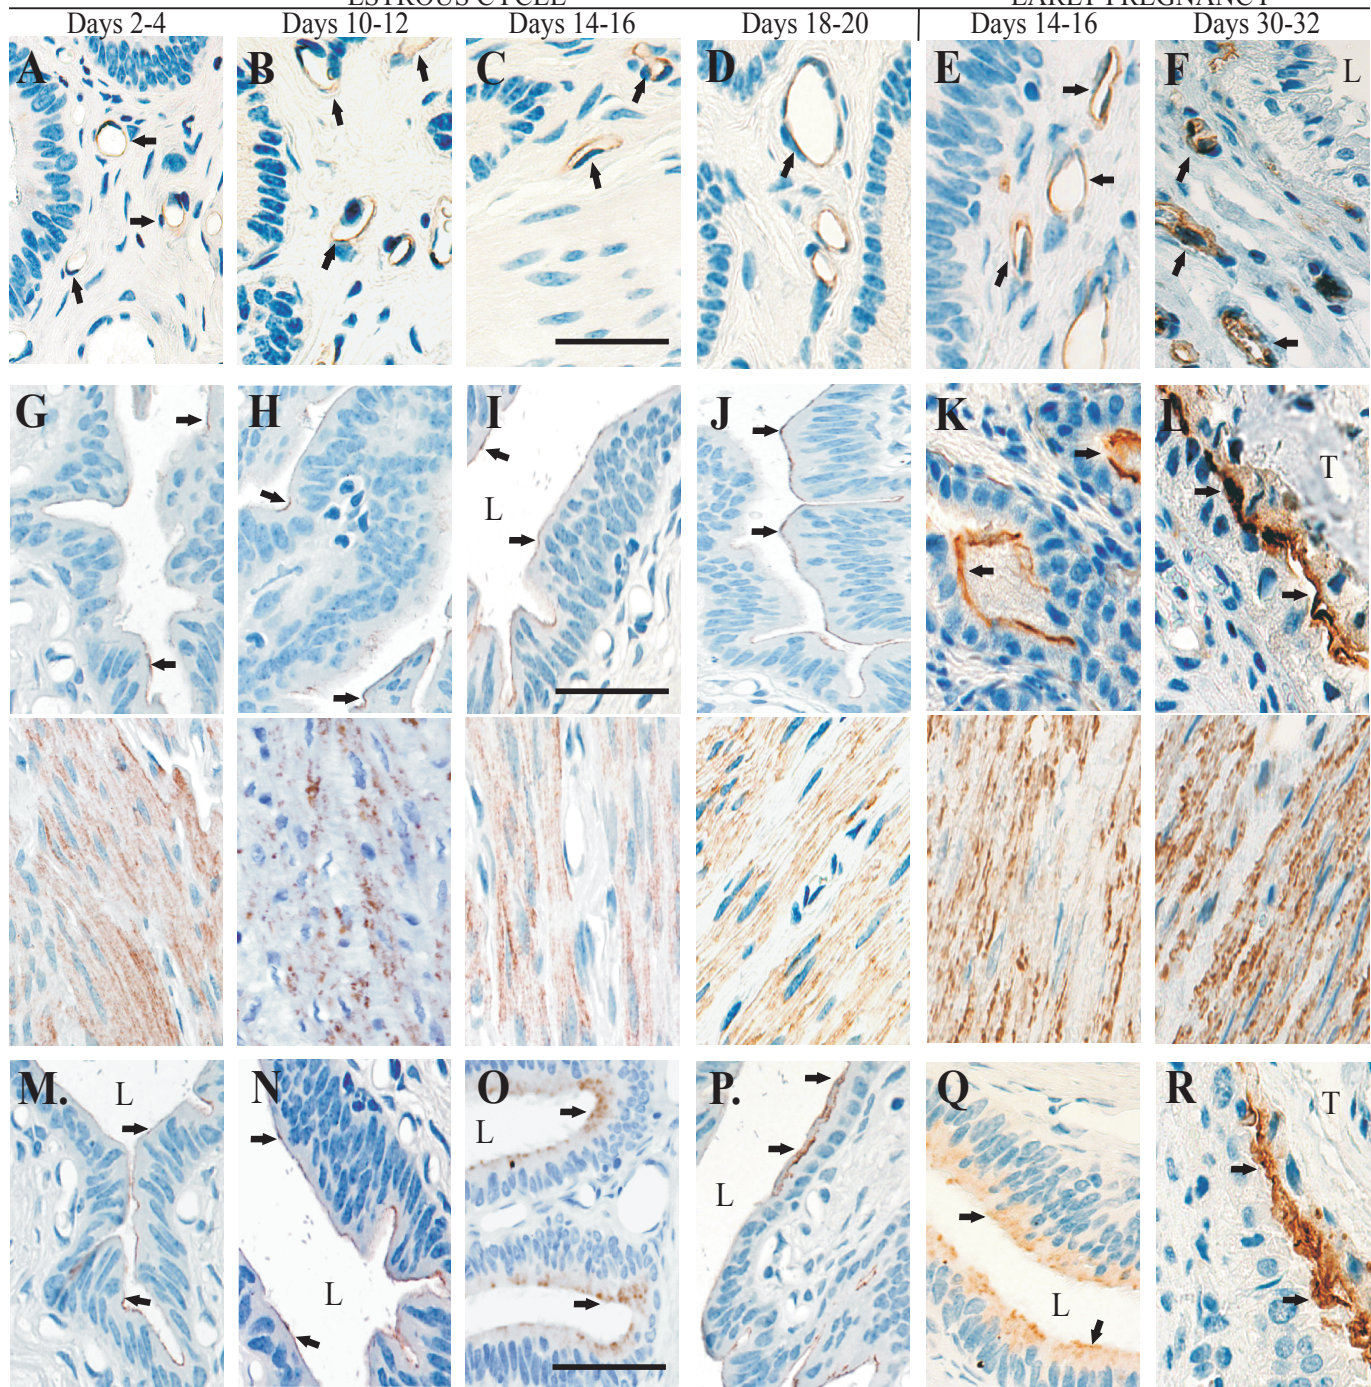

CONTROL AQP1

CONTROL AQP5

CONTROL AQP9

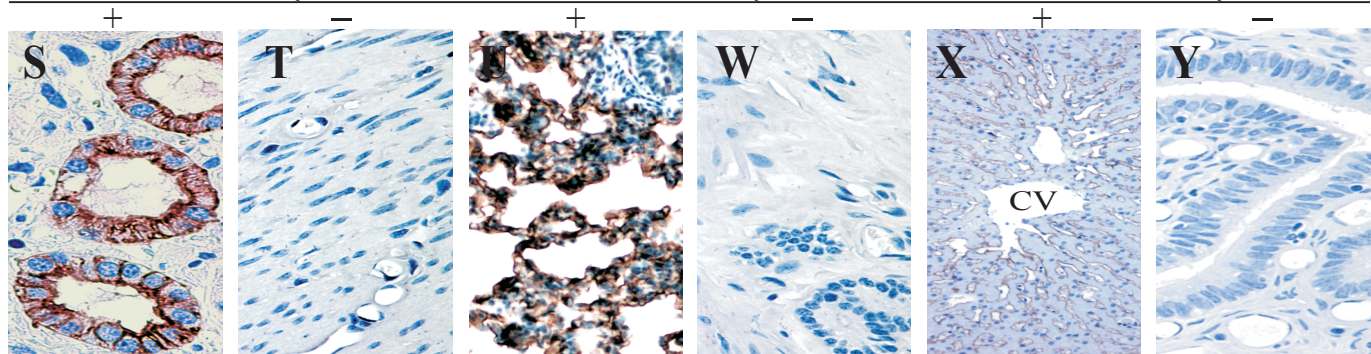

Supplement: MOESM4 [file 9568362]
